# Supplementary material
Source: PubMed Central journal article supplement (PMC6646540)
Supplement: ao8b02245_si_001.pdf [file ao8b02245_si_001.pdf]

**SUPPLEMENTARY MATERIAL**

**Self-interaction of Human Serum Albumin. A  
formulation perspective**

*Pernille Sønderby<sup>a</sup>, Jens T. Bukrinski<sup>c</sup>†, Max Hebditch<sup>b</sup>, Günther H.J. Peters<sup>a</sup> and Robin A. Curtis<sup>b\*</sup>, Pernille Harris<sup>a\*</sup>*

<sup>a</sup> Department of Chemistry, Building 207, Technical University of Denmark, DK-2800 Kgs. Lyngby, Denmark

<sup>b</sup> School of Chemical Engineering and Analytical Science, The University of Manchester, Sackville Street, Manchester M13 9PL, U.K

<sup>c</sup>Novozymes Biopharma A/S, Krogshøjvej 36, Bagsværd, DK-2880, Denmark.

**Table S1 Samples for SAXS experiments performed at varying protein concentrations.**

| Buffer               | Protein sample    | Protein concentration (mg/mL) |
|----------------------|-------------------|-------------------------------|
| Octanoate_pH7.0_I153 | Recombumin® Alpha | 0.9 – 143.8                   |
| Phosphate_pH6.2_I66  | Recombumin® Alpha | 0.8- 181.8                    |
| Citrate_pH6.5_I274   | Recombumin® Alpha | 1.7- 315.1                    |

**Table S2 Samples for SAXS experiments performed at varying NaCl concentrations. The salt concentration in the original buffer has been exchanged with the indicated salt concentrations.**

| Buffer          | rHSA concentration (mg/mL) | NaCl concentration (mM)                    |
|-----------------|----------------------------|--------------------------------------------|
| Octanoate_pH7.0 | 45                         | 10, 20, 50, 100, 150, 200, 500, 1000, 2000 |
| Phosphate_pH6.2 | 40                         | 10, 20, 50, 100, 150, 200, 500, 1000, 2000 |

**Table S3 Experimental set up of SAXS measurements.**

|                                 |                          |
|---------------------------------|--------------------------|
| Instrument                      | MaxIV beamline I911-SAXS |
| Detector                        | Pilatus 1M               |
| Wavelength (Å)                  | 0.9100                   |
| $q$ range (nm)                  | 0.0825-5.0               |
| Exposure time (s)               | 3×60                     |
| Temperature (K)                 | 285                      |
| Sample – detector distance (mm) | 1972.485                 |

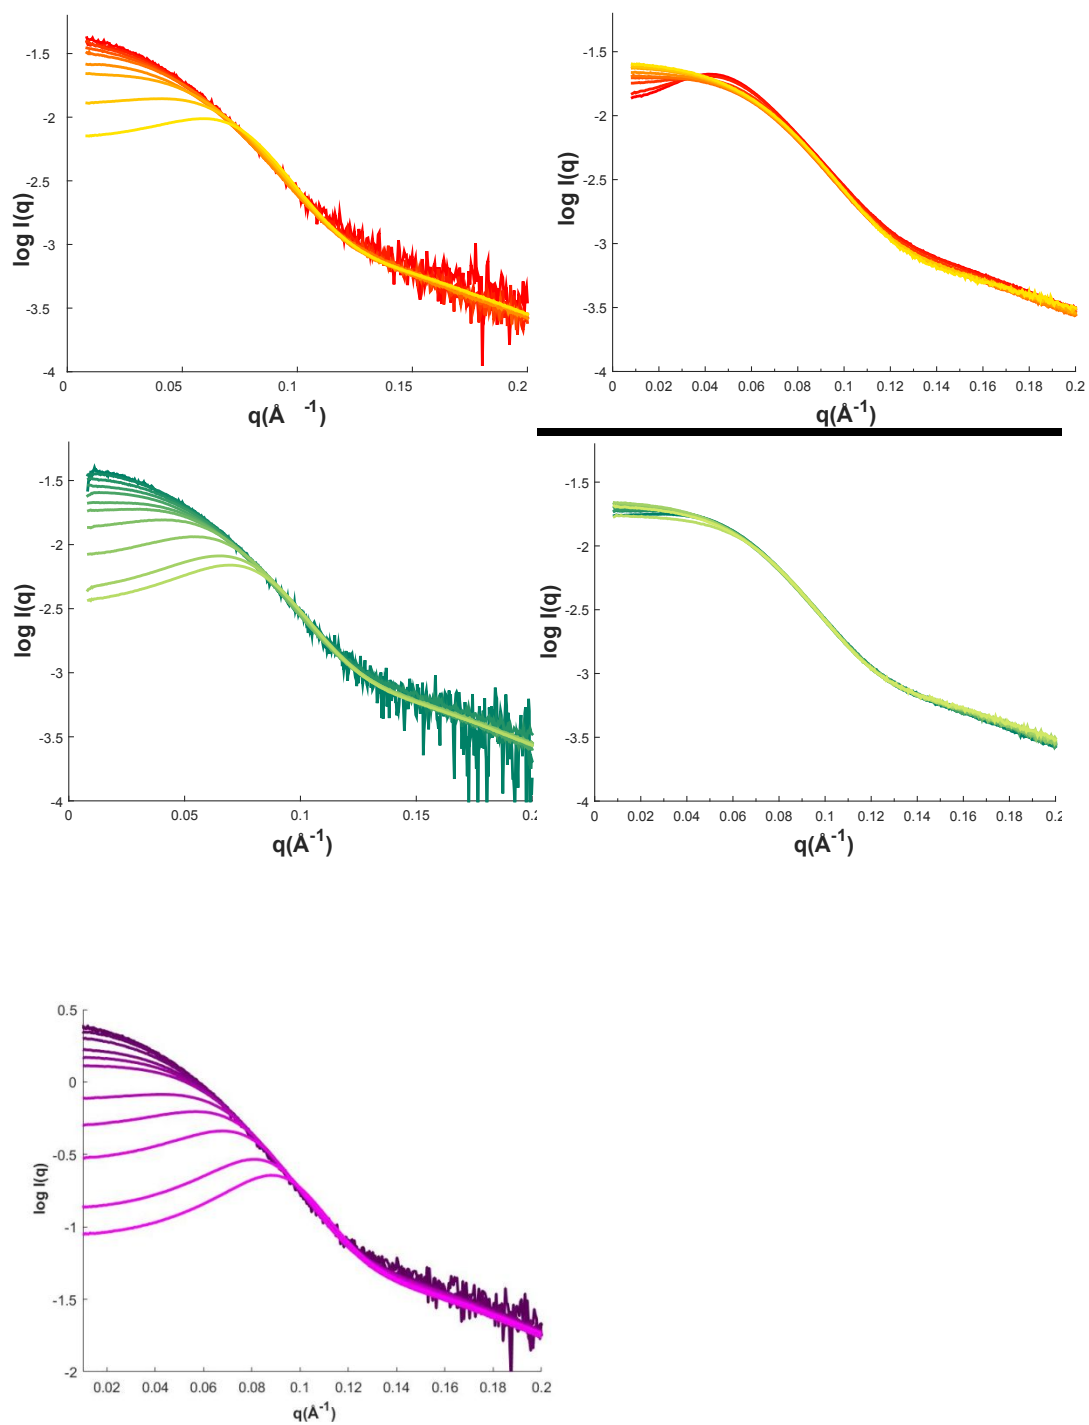

**Figure S1 SAXS scattering curves.** a): Octanoate\_pH7.0\_I153, c): Phosphate\_pH6.2\_I66 e): Citrate\_pH6.5\_I274. Data are shown for different rHSA concentration where increasing concentration is indicated by decreasing color intensity. b): Octanoate\_pH7.0, d): Phosphate\_pH6.2, rHSA at ~40 mg/ml with varying NaCl concentration. Increasing NaCl-concentration with decreasing colour intensity.

**Table S4** Overview over all sample parameters for samples 1-10 mg/ml. All other samples show large deviations from ideality due to repulsion.

| Buffer               | Protein concentration (mg/ml) | R <sub>G</sub> (Guinier) (nm) | StDev | Porod Vol | R <sub>G</sub> (Gnom) (nm) | D <sub>max</sub> (nm) | I(0) (Gnom) | Mw (g/mol) |
|----------------------|-------------------------------|-------------------------------|-------|-----------|----------------------------|-----------------------|-------------|------------|
| Octanoate_pH7.0_I153 | 0.85                          | 3.05                          | 0.12  | 113.01    | 3.06                       | 10.45                 | 0.0411      | 66.9       |
| Octanoate_pH7.0_I153 | 1.65                          | 2.98                          | 0.11  | 113.05    | 3.01                       | 10.22                 | 0.0786      | 65.9       |
| Octanoate_pH7.0_I153 | 3.87                          | 2.95                          | 0.09  | 108.72    | 2.94                       | 10.32                 | 0.178       | 63.7       |
| Octanoate_pH7.0_I153 | 7.36                          | 2.82                          | 0.05  | 103.12    | 2.83                       | 8.61                  | 0.32        | 60.2       |
| Phosphate_pH6.2_I66  | 0.78                          | 2.86                          | 0.19  | 97.49     | 2.81                       | 8.93                  | 0.0385      | 68.3       |
| Phosphate_pH6.2_I66  | 1.56                          | 2.77                          | 0.08  | 93.40     | 2.79                       | 8.85                  | 0.0697      | 61.9       |
| Phosphate_pH6.2_I66  | 3.94                          | 2.76                          | 0.10  | 96.68     | 2.71                       | 8.72                  | 0.197       | 69.3       |
| Phosphate_pH6.2_I66  | 7.7                           | 2.63                          | 0.20  | 95.44     | 2.7                        | 8.01                  | 0.359       | 64.5       |
| Citrate_pH6.5_I274   | 1.67                          | 2.91                          | 0.03  | 104.14    | 2.87                       | 9.17                  | 0.078       | 64.7       |
| Citrate_pH6.5_I274   | 3.77                          | 2.85                          | 0.04  | 103.89    | 2.83                       | 9.08                  | 0.176       | 64.6       |
| Citrate_pH6.5_I274   | 9.02                          | 2.71                          | 0.01  | 97.16     | 2.73                       | 7.86                  | 0.393       | 60.3       |
